# Supplementary material for: Ionic dimeric pyrogallol[4]arene capsules
Source: Royal Society of Chemistry journal article supplement (doi:10.1039/b707009h), 2007-01-01
Supplement: b707009h.pdf [file b707009h.pdf]

**Electronic Supplementary Information for Manuscript**

**Entitled: Ionic Dimeric Pyrogallol[4]arene Capsules**

**Scott J. Dalgarno, Nicholas P. Power, Jerry L. Atwood**

Information comprises:

- Selected tables of bond distances for **1·CsCl** and **2·CsCl**.
- Additional figures as outlined in the manuscript.

**Table S1.** Selected interatomic distances (Å) with s.u.s in parentheses for **1·CsCl**.

---

|                            |            |                            |          |
|----------------------------|------------|----------------------------|----------|
| Cs(1)-O(10) <sup>(a)</sup> | 3.072(4)   | Cs(1)-O(6) <sup>(b)</sup>  | 3.098(4) |
| Cs(1)-O(12)                | 3.199(4)   | Cs(1)-O(1)                 | 3.207(4) |
| Cs(1)-N(1)                 | 3.228(6)   | Cs(1)-O(11) <sup>(a)</sup> | 3.286(4) |
| Cs(1)-O(13)                | 3.344(5)   | Cs(1)-O(2)                 | 3.354(4) |
| Cs(1)-O(14)                | 3.368(5)   | Cs(1)-O(5) <sup>(b)</sup>  | 3.393(4) |
| Cs(1)-Cl(2)                | 3.5732(19) | Cs(1)-C(2)                 | 3.586(5) |
| O(5)-Cs(1) <sup>(b)</sup>  | 3.393(4)   | O(6)-Cs(1) <sup>(b)</sup>  | 3.098(4) |
| O(10)-Cs(1) <sup>(c)</sup> | 3.072(4)   | O(11)-Cs(1) <sup>(c)</sup> | 3.286(4) |

---

Key giving operations for symmetry related atoms:

- (a) 1-x, 1/2+y, 1/2-z
- (b) 1-x, 1-y, 1-z
- (c) 1-x, -1/2+y, 1/2-z

**Table S2.** Selected interatomic distances (Å) with s.u.s in parentheses for **2·CsCl**.

---

|                            |          |                            |          |
|----------------------------|----------|----------------------------|----------|
| Cs(1)-O(11) <sup>(a)</sup> | 3.084(5) | Cs(1)-O(3) <sup>(b)</sup>  | 3.132(6) |
| Cs(1)-O(2) <sup>(b)</sup>  | 3.144(5) | Cs(1)-O(8) <sup>(c)</sup>  | 3.245(6) |
| Cs(1)-O(6) <sup>(d)</sup>  | 3.258(6) | Cs(1)-O(1)                 | 3.392(6) |
| Cs(1)-Cl(1)                | 3.512(3) | Cs(1)-O(2)                 | 3.567(6) |
| Cs(1)-O(7) <sup>(c)</sup>  | 3.756(7) | Cs(1)-Cs(1) <sup>(b)</sup> | 5.687(3) |
| O(2)-Cs(1) <sup>(b)</sup>  | 3.144(5) | O(3)-Cs(1) <sup>(b)</sup>  | 3.132(6) |
| O(6)-Cs(1) <sup>(d)</sup>  | 3.258(6) | O(7)-Cs(1) <sup>(e)</sup>  | 3.756(7) |
| O(8)-Cs(1) <sup>(e)</sup>  | 3.245(6) | O(11)-Cs(1) <sup>(a)</sup> | 3.085(5) |

---

Key giving operations for symmetry related atoms:

- (a) 1-x, 1-y, 1-z
- (b) 1-x, 2-y, 1-z
- (c) -1+x, +y, +z
- (d) 2-x, 2-y, 1-z
- (e) 1+x, +y, +z

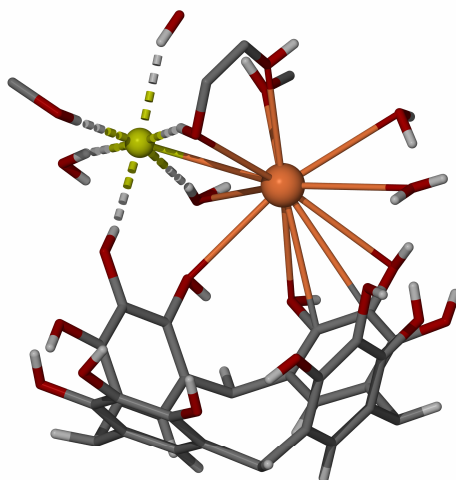

**Figure S1.** Hydrogen bonding associated with the chloride in **1·CsCl**.

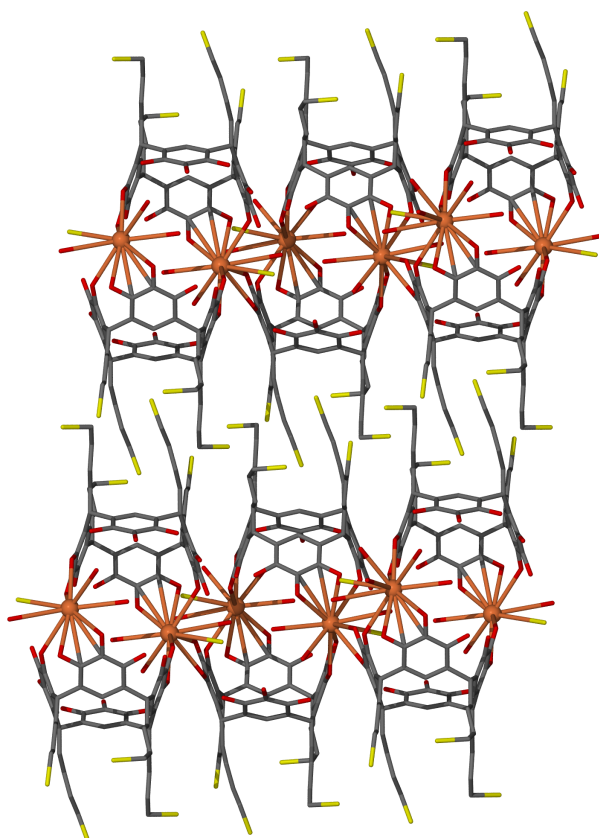

**Figure S2.** The extended bi-layer structure in **1·CsCl**.

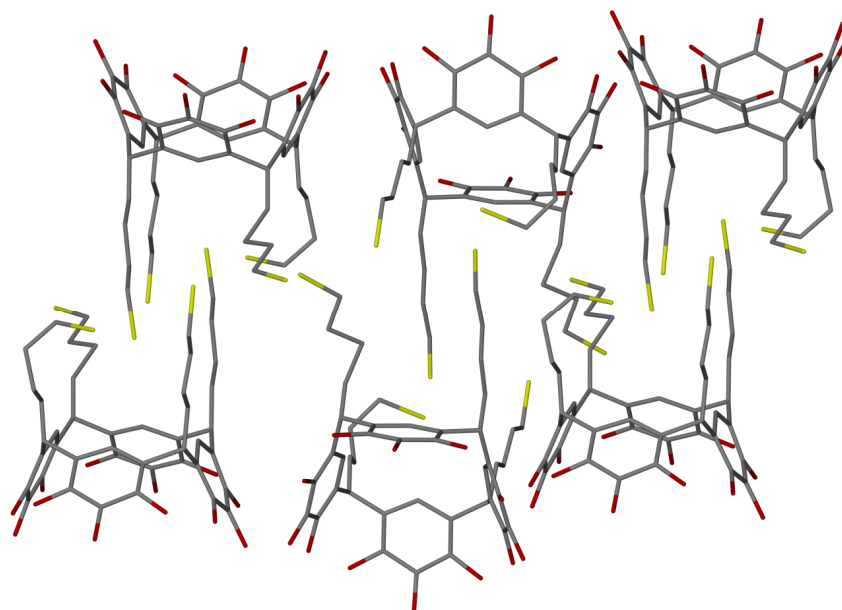

**Figure S3.** Extended bi-layer structure formed when **1** is crystallised from methanol.<sup>15</sup>

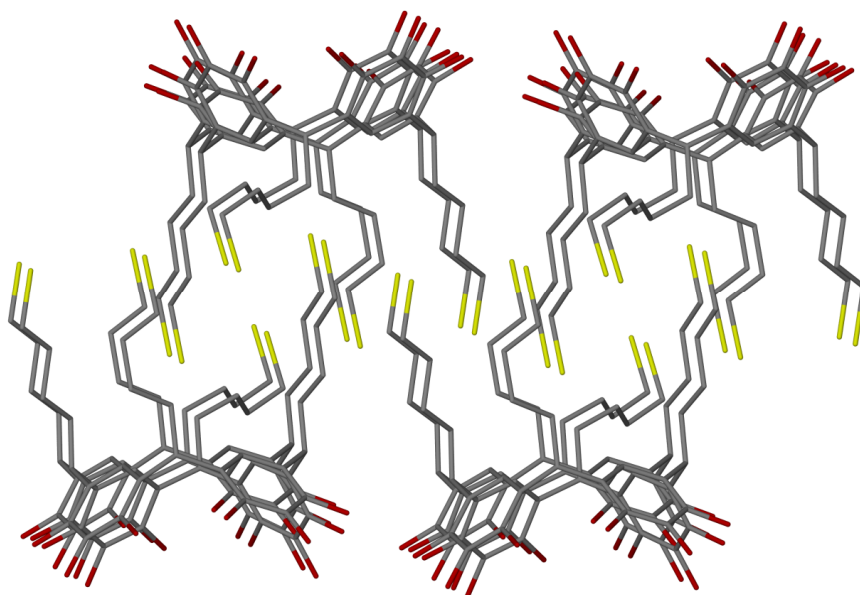

**Figure S4.** Extended bi-layer structure formed when **1** is crystallised from ethyl acetate.<sup>15</sup>

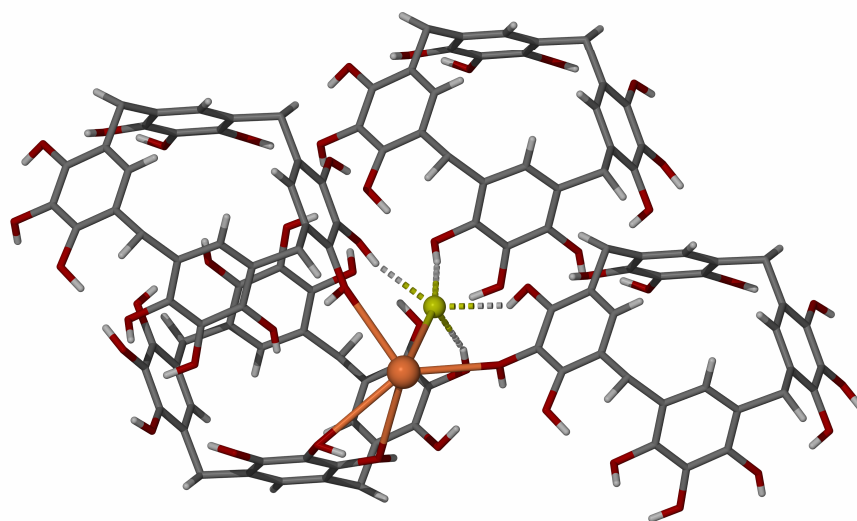

**Figure S5.** Hydrogen bonding associated with the chloride in  $2 \cdot \text{CsCl}$ .

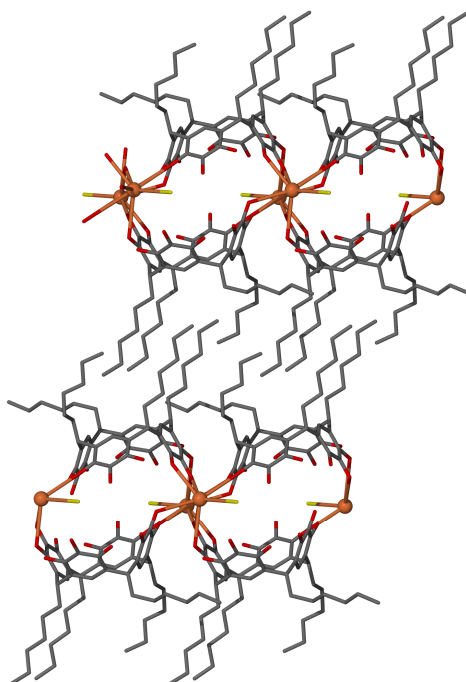

**Figure S6.** View of the fourth lower rim hexyl chain bending away from the base of the bowl-shaped molecule in the extended structure based on **2**.

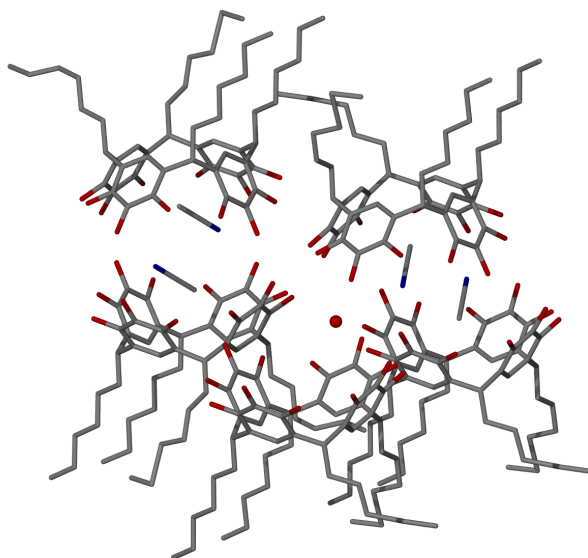

**Figure S7.** View of the water of crystallisation in the ‘metal free’ dimeric capsule structure based on **2** when crystallised from a acetonitrile.<sup>13d</sup>

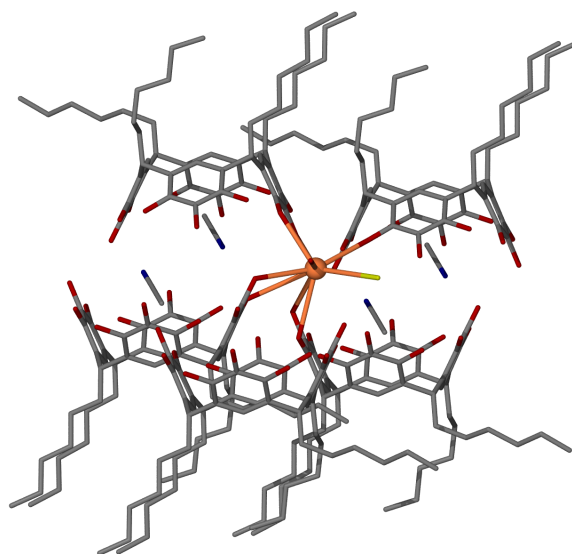

**Figure S8.** View of the close substitution of water of crystallisation in figure S7 for caesium in the dimeric capsule structure of **2·CsCl**.
